## **Making Pastoralists Count:**

### **Geospatial Methods for the Health Surveillance of Nomadic Populations**

*Hannah Wild<sup>1\*</sup>, Luke Glowacki<sup>2\*</sup>, Stace Maples<sup>3</sup>, Iván Mejía-Guevara<sup>4,5</sup>, Amy Krystosik<sup>6</sup>, Matthew H. Bonds<sup>7</sup>, Abiy Hiruy<sup>8</sup>, A. Desiree LaBeaud<sup>6</sup> and Michele Barry<sup>9</sup>*

<sup>1</sup>Stanford University School of Medicine, Stanford, CA, USA

<sup>2</sup>Department of Anthropology, Pennsylvania State University

<sup>3</sup>Stanford Geospatial Center, Stanford University, Stanford, CA, USA

<sup>4</sup>Department of Biology, Stanford University, Stanford, CA, USA

<sup>5</sup>Stanford Center for Population Health Sciences, Stanford University School of Medicine, Stanford, CA, USA

<sup>6</sup>Department of Pediatrics, Division of Infectious Disease, Stanford University School of Medicine, Stanford, CA, USA

<sup>7</sup>Department of Global Health & Social Medicine, Harvard Medical School, Boston, MA, USA

<sup>8</sup>Pathfinder International, Addis Ababa, Ethiopia

<sup>9</sup>The Center for Innovation in Global Health, Stanford University, Stanford, CA, USA

\* To whom correspondence should be addressed. Contact: [hwild@stanford.edu](mailto:hwild@stanford.edu), (907) 406-0378 or [glowacki@psu.edu](mailto:glowacki@psu.edu), (814) 867-0013

**Keywords:** Pastoralists, nomadic populations, health surveillance, household surveys, DHS

**Abstract:** 250 words

**Text:** 4282 words

**Figures:** 3

**Tables:** 4

**Supplementary Materials:** Supplementary text (methods), tables (4), figure (1) and appendix

## Abstract

Nomadic pastoralists are among the world's hardest-to-reach and least-served populations. Pastoralist communities are notoriously difficult to capture in household surveys due to factors including their high degree of mobility, the remote terrain they inhabit, fluid domestic arrangements, and cultural barriers. Most surveys utilize census-based sampling frames which do not accurately capture the demographic and health parameters of nomadic populations. As a result, pastoralists are largely "invisible" in population data such as the Demographic and Health Surveys (DHS). By combining remote sensing and geospatial analysis, we developed an alternative sampling strategy designed to capture the current distribution of nomadic populations. We then implemented this sampling frame to survey a population of mobile pastoralists in southwest Ethiopia, focusing on maternal and child health (MCH) indicators. Using standardized instruments from DHS questionnaires, we assessed the MCH status of this population in order to draw comparisons with regional and national data. We find substantial disparities between our data collected using a geospatial sampling frame and regional DHS data in core MCH indicators including vaccination coverage, skilled birth attendance, and nutritional status. Census-based measures do not adequately capture population-level characteristics, risking substantial misreporting of the health status of mobile populations. Our study is the first to employ a geospatial survey of a nomadic group at the population level, and our field validation demonstrates that this methodology is a logistically feasible alternative to conventional sampling frames. Geospatial sampling methods open up cost-affordable and logistically feasible strategies for sampling pastoralists and other mobile populations, which is a crucial first step towards reaching these underserved groups with health services.

## 1 **Introduction**

2

3 Nomadic pastoralists defy some of the most basic premises of household demographic surveys:  
4 namely, that individuals are attached to a geographically stable household, and that this  
5 household represents a relatively fixed domestic unit.<sup>1</sup> By contrast, pastoralist settlements are  
6 often highly mobile, moving over large areas of remote terrain with herds of cattle and caprines  
7 on which they subsist.<sup>2</sup> Their domestic arrangements are similarly fluid, as family members  
8 reside in different geographic locations to manage their livestock. Combined with the dispersed  
9 distribution of their encampments and cultural barriers, these mobility patterns make surveying  
10 nomadic pastoralists a notoriously difficult enterprise.

11

12 Despite being some of the most underserved populations in Sub-Saharan Africa,<sup>3</sup> nomadic  
13 pastoralists are among the least represented in the population data used to plan health  
14 interventions.<sup>4</sup> Large-scale household surveys such as the Demographic and Health Surveys  
15 (DHS) Program conventionally use census-based sampling frames, which magnify and  
16 institutionalize the issue of mobile pastoralists' under-enumeration in the original census. Such  
17 strategies result in the "statistical invisibility" of nomadic populations.<sup>1</sup> A lack of accurate data  
18 prevents anything but speculative estimates of the global population of mobile pastoralists,  
19 though numbers ranging from 50 to 217.5 million have been put forth.<sup>4,5</sup> Pastoralists across the  
20 globe face stressors that threaten their health and livelihoods including ecologic disruptions,  
21 large-scale development projects, conflict, and protracted humanitarian crises. With mounting  
22 concerns about emerging zoonotic pandemic disease, it is critical to find logistically feasible  
23 ways of including nomadic populations in health surveillance systems.

24

25 Diverse methodological approaches to achieving representative samples of mobile populations  
26 have been tested, including a “waterpoint approach” in which data is collected at waterholes;<sup>6</sup> a  
27 capture-recapture transect approach similar to that used to monitor wildlife;<sup>7</sup> random geographic  
28 cluster sampling;<sup>8</sup> and the use of mobile phones.<sup>9</sup> Many of the approaches explored in these  
29 studies have been limited by logistical obstacles and do not lend themselves to being scaled and  
30 integrated into standardized large-scale data collection exercises such as the DHS.

31

32 Geospatial methods present new opportunities for sampling mobile pastoralists, and have been  
33 employed with sedentary populations<sup>10,11</sup> as well as at the single-village level.<sup>12</sup> However,  
34 geospatial methods have not been used to develop and implement sampling frames at a scale that  
35 could be integrated with existing national health surveillance systems. In this study, we develop  
36 and assess the utility and feasibility of a geospatial sampling frame to administer household  
37 surveys to mobile pastoralists in a remote region of Ethiopia.

38

## 39 **Materials and Methods**

### 40 Study Site and Population

41 The Nyangatom are nomadic pastoralists numbering approximately 25,000 individuals.<sup>13</sup> They  
42 inhabit a remote lowland area of approximately 2,600 square km on the border between  
43 Ethiopia’s Lower Omo Valley and South Sudan. Their settlement pattern consists of mobile  
44 camps ranging from several families to two hundred individuals in size, as well as semi-  
45 permanent villages associated with areas of seasonal crop cultivation. The composition of all  
46 encampment types is fluid, as individuals move from settlement to settlement.<sup>14</sup> Our target

47 population included women of reproductive age and their under-five-year-old children. We  
48 surveyed 342 mothers of reproductive age and recorded data on the health status of 826 of their  
49 children 15 years of age and younger, 547 of whom were under five.

50

#### 51 Ethical Precautions

52 Verbal informed consent from adults and oral assent from minors was obtained from all study  
53 participants. Participants' personal health information (PHI) was protected on researchers' fully  
54 encrypted devices with procedures for de-identification of data during analysis, and no PHI was  
55 linked to geospatial data in the public domain. Ethical approval for this study was obtained from  
56 the Institutional Review Board for Human Subjects Research at Stanford University School of  
57 Medicine, the Ministry of Science and Technology, and the Southern Nations, Nationalities, and  
58 Peoples' Regional Health Bureau in Hawassa, Ethiopia.

59

#### 60 Sampling Design

61 We used 0.5-meter resolution satellite imagery in visible and infrared imagery bands collected  
62 within four months of survey administration (WorldView-3 on April 26th, 2017). The imagery  
63 was first prepared using the Geographic Data Abstraction Library (GDAL), allowing pan-  
64 sharpening, band-reduction, and export of False-Color Infrared images in RGB format, which we  
65 used to assist in assessing settlement inhabitation status. The resulting imagery was then  
66 converted into an Esri Tile Package and deployed to the ArcGIS Online platform to identify  
67 settlements. Using the Hanna Immersive Visualization Environment (HIVE) at Stanford's  
68 Institute for Computational & Mathematical Engineering (ICME), consisting of 35 HD screens  
69 with an effective resolution of 13440x5400, we tagged actively inhabited settlements and

70 recorded WGS84 geospatial coordinates for use in clustering. Since nomadic dwellings are  
71 typically constructed from natural materials such as saplings and grass, inhabited versus  
72 abandoned settlements can be difficult to distinguish from satellite imagery. We used the  
73 presence of significant vegetation in the interior of a settlement as an indicator that the settlement  
74 was uninhabited. Inhabited settlements contain little interior vegetation due to the presence of  
75 grazing livestock, while uninhabited villages tend to be overgrown.

76

77 [Figure 1 here]

78

79 **Figure 1.** Nyangatom settlement (diameter approx. 100m) with huts, livestock kraals, and perimeter fence  
80 viewed using Infrared and Visible Multispectral Imagery (red indicates vegetation.) Captured from imagery  
81 covering total land area of 5000km<sup>2</sup> at a resolution of 0.53m. (Imagery provided by DigitalGlobe  
82 Foundation)  
83

84 Next, we clustered settlements using an iterative method by generating Thiessen polygons from a  
85 randomly distributed array of 15 points. We then based our sampling design on these clusters  
86 using a two-stage cluster survey design. We constructed 15 primary sampling units (PSUs)  
87 covering the entire survey area. The PSUs were developed using geospatial data that included the  
88 location of villages and dwellings allowing us to infer the population density in specific areas, as  
89 well as by using supportive information about natural or man-made boundaries (e.g., rivers,  
90 roads). A sample of three of these units was then selected with probability proportional to size  
91 sampling (PPS) based on the number of dwellings identified in the geospatial data. Lastly, we  
92 carried out a field survey in the selected units. We conducted in-person interviews on maternal  
93 and child health with women of reproductive age who reported having a birth at any time during  
94 the five years preceding the survey, and collected anthropometric data for the three youngest

95 children aged 0-15 for each woman in our sample. Our survey instruments were developed using  
96 questionnaires from the most recent Ethiopian Demographic and Health Survey (EDHS).<sup>15</sup>

97

#### 98 Field Procedures

99 For each settlement that was selected for the field survey, researchers used GPS coordinates  
100 obtained from satellite imagery to locate nomadic encampments in the field. If upon reaching the  
101 settlement it was abandoned or could not be located, we selected the spatially nearest  
102 replacement. If no spatially proximate alternate could be identified, we selected the next  
103 randomly-assigned numerical ID in the enumeration list as a replacement. Due to the remote  
104 terrain and logistical difficulty of accessing each village, we defined a settlement as the 500m<sup>2</sup>  
105 surrounding the central point tagged from satellite imagery and included respondents from the  
106 target population present within this area. Study personnel adhered to DHS protocols while  
107 conducting interviews and obtaining anthropometric measurements. We measured height (cm)  
108 and weight (kg) for a subset of eligible under-five-year-old children using adjustable ShorrBoard  
109 measuring boards and digital SECA scales. Standing height was measured for children aged two  
110 to five years, and recumbent length was measured for children less than two years of age.

111

#### 112 Analysis

113 We conducted descriptive statistical analyses of basic demographic and health indicators for  
114 mothers and their three youngest children below the age of 16. We used the 2016 Ethiopian  
115 Demographic and Health Survey (EDHS) survey,<sup>15</sup> containing information on 16,650 households  
116 and 10,335 rural women as a benchmark for assessing the health status of our sample in  
117 comparison with similar populations from other regions of Ethiopia. Where EDHS data are

118 available at the regional level, we compare our results to data for the Southern Nations,  
119 Nationalities, and People's Region (SNNPR), of which the Nyangatom administrative district  
120 (*woreda*) is a part. Where EDHS data is disaggregated only by urban versus rural residence at the  
121 national level, we compare our results to data from rural areas.

122

123 For mothers in our sample we report marriage indicators including marital status, number of  
124 wives, and wife order in polygynous marriages. We calculated fertility indicators based on the  
125 number of live births and miscarriages per woman, as well as data on subsequent deaths of  
126 children. We also collected data on MCH indicators including antenatal care (ANC) visits,  
127 services delivered during the ANC visit, location of child birth, vaccination coverage, and  
128 autonomy of women to seek health services, among others (full questionnaire in SI Appendix).  
129 Consistent with the DHS program, we collected information on treatment-seeking behavior for  
130 symptoms of diarrhea, fever, and cough among under-five-year-old children.

131

132 Raw height and weight measures were converted to age- and sex-specific z-scores represented by  
133 standard deviation (SD) units by using the WHO child growth standards.<sup>16</sup> We constructed three  
134 indicators of anthropometric failure, defined using z-scores less than -2 SD of the median  
135 Height-for-Age (HAZ) for stunting, Weight-for-Age (WAZ) for underweight, and Weight-for-  
136 Height (WHZ) for wasting. Severe anthropometric failure was defined on the basis of z-scores  
137 less than -3 SD of the respective anthropometric scores. Mid-upper arm circumference (MUAC)  
138 was also measured (cm) for children aged 6-59 months and used as an alternative assessment to  
139 identify Severe Acute Malnutrition (SAM), defined for infants/children with a  $MUAC < 11.5\text{cm}$ <sup>16</sup>  
140 (see SI Methods).



141

142 **Results**

143 We interviewed 342 women reporting having given birth during the five years preceding the  
144 survey. Maternal age was not recorded because the Nyangatom do not keep track of their own  
145 age; however, we assumed a reproductive range of 15-49 years.

146

147

148 **Table 1** Marriage, fertility, and mortality indicators of women and their children (Nyangatom, 2017)

| Indicator                                         | Ethiopia DHS 2016<br>Weighted % (p-<br>value <sup>6</sup> ) | Nyangatom 2017<br>(Weighted %) |
|---------------------------------------------------|-------------------------------------------------------------|--------------------------------|
| Number of all women interviewed                   |                                                             | 347                            |
| Mean number of wives per husband (sd)             |                                                             | 2.56 (0.79)                    |
| Marital Status                                    |                                                             |                                |
| Unmarried <sup>1</sup>                            | 32 (<0.01)                                                  | 1 (0.2)                        |
| Married / Living together                         | 65.2 (<0.01)                                                | 338 (97.4)                     |
| Widowed                                           | 2.7 (0.34)                                                  | 8 (2.3)                        |
| Total                                             | 100                                                         | 347 (100)                      |
| Wife Order (if other wives)                       |                                                             |                                |
| 1                                                 |                                                             | 71 (39.8)                      |
| 2                                                 |                                                             | 69 (38.7)                      |
| 3                                                 |                                                             | 23 (12.7)                      |
| 4+                                                |                                                             | 11 (5.6)                       |
| Missing / Refused                                 |                                                             | 7 (3.1)                        |
| Total                                             |                                                             | 181 (100)                      |
| Ownership of farm animals <sup>2</sup>            | 87.6 (0.02)                                                 | 328 (96.8)                     |
| Fertility (SD) <sup>3</sup>                       |                                                             |                                |
| Mean number of live births per woman <sup>4</sup> | 5.2                                                         | 5.15 (3.01)                    |
| Mean number of miscarriages per woman             |                                                             | 1.49 (0.71)                    |
| Mean number of pregnancies per woman              |                                                             | 5.69 (3.33)                    |
| Mortality Rates (SD) <sup>5</sup>                 |                                                             |                                |
| Mean number of male child deaths per woman        |                                                             | 1.01 (0.87)                    |
| Mean number of female child deaths per woman      |                                                             | 0.76 (0.79)                    |
| Mean number of child deaths per woman             |                                                             | 1.77 (1.09)                    |

149

150

**Source:** Nyangatom data.

151

<sup>1</sup> Includes 'Never married' and 'Divorced/separated' in DHS 2016.

152

<sup>2</sup> In DHS, numbers are from rural areas and include: cows, bulls, other cattle, horses, donkeys, camels, goats, sheep, chickens or other poultry, or beehives.

153

154

<sup>3</sup> Indicators from Nyangatom are based on the number of children ever born alive or miscarried. The age of women is unknown, but women were interviewed approximately in the age range of 15-49.

155

156

<sup>4</sup> The value in the DHS 2016 column corresponds to the Total Fertility Rate (TFR) in rural areas, calculated for the 3 years preceding the survey.

157

158

<sup>5</sup> Mortality estimates from Nyangatom are based on reports from the mother regarding the number of male and female children who ever died. We did not consider a period of exposure nor a specific age group as

159

160 we ignore the age of the child when the death occurred.<sup>6</sup> p-value of the Adjusted Wald test (that accounts  
161 for the survey design) for the null Hypothesis  $H_0: \text{Prop}_{\text{DHS2016}} = \text{Prop}_{\text{Nyangatom2017}}$ , with a level of  
162 significance of 5% ['Prop' stands for 'mean' or 'proportion'].  
163

164 **Table 1** presents background demographic information on the Nyangatom women of reproductive age included in  
165 our analysis, including marriage status, wife ranking, and indicators of fertility and mortality among our sample. The  
166 average number of live births per Nyangatom woman was 5.2, slightly higher than the Total Fertility Rate (TFR)  
167 observed in SNNPR in the 2016 EDHS (4.4 average live births per woman), while the mortality rate of offspring  
168 born to women in our sample was 252 per 1000 live births (See SI Methods).  
169

### 170 Antenatal Care (ANC) and Delivery

171 256 of 342 women (75.9%) reported receiving ANC at least once during their most recent  
172 pregnancy, 71.6% (95% CI: 56.0-83.3%) of which visited a skilled provider as defined by the  
173 EDHS including nurses, midwives, health officers, health extension workers, and other  
174 medically-trained personnel. These rates are comparable to those reported by the 2016 EDHS for  
175 women regionally in SNNPR, 69.3% of whom received ANC services at least once from a  
176 skilled provider. Nyangatom women were 4.0 (3.0-6.0) months pregnant (median, IQR) at the  
177 time of their first visit to an ANC provider and made an average of 2.8 (2.4-3.2) visits during  
178 their most recent pregnancy. The majority of women in our sample who had given birth to a  
179 child under five years of age at the time of the study did so at their home or another home  
180 (91.2%, 95% CI: 61.3-98.6%), and in a health facility or clinic in only 6.8% (1.0-36.3%) of all  
181 deliveries. In comparison, the 2016 EDHS found that 72.5% of women in the region delivered at  
182 home, and in a health facility or clinic for 25.5% of all deliveries. See SI Table 2 for  
183 comprehensive descriptive statistics of antenatal care seeking behavior and antenatal services.

184

### 185 Problems Accessing Health Care

186 Women reported that the primary impediments to receiving health care were not wanting to  
187 travel alone (44.0%, 95% CI: 25.6-64.2%) and distance to the health facility (43.3%, 95% CI:

188 17.0-74.0%). Compared to regional data from the 2016 EDHS in which 76.7% of women  
189 reported being responsible for decisions about her own health care, only 54% percent of  
190 Nyangatom women in our sample reported being involved in decision-making, while 45% cited  
191 their husbands as being the sole party responsible for making decisions regarding the health care  
192 for the woman herself (Figure 2). However, only a small proportion (2.9%, 95% CI: 0.4-20.0,  
193 11/347) of women reported that obtaining permission from her husband to visit a health facility  
194 was a significant barrier to accessing care. Nearly all women requested permission from their  
195 husbands before traveling to a health facility (91.5%, 95% CI: 78.0-97.1%), but of these women,  
196 the vast majority (97.7%, 95% CI: 91.6-99.4%) reported that their husbands granted them  
197 permission all of the time (Table 2).

198 **[Figure 2 here]**

199 **Figure 2.** Women's participation in decision making about their own health<sup>1</sup>

200 **Source:** Nyangatom sample and EDHS (2016).

201 <sup>1</sup> Excluding the 1% of respondents who refused.

202

203 Women reported having more agency in decision-making for the healthcare of their children than  
204 in their own healthcare: 61.4% of women reported being involved in decision-making for the  
205 healthcare of her children. Numerous women reported that they consulted their husbands only in  
206 order to obtain money when they themselves did not possess money for transportation to the  
207 clinic or services at the clinic. A lack of alternative arrangements to care for livestock and  
208 domestic labor was cited by respondents as a major barrier to care (Table 2).

209

210

211 **Table 2** Problems accessing health care (Nyangatom, 2017)

|                                                | n   | Weighted % [SE <sup>1</sup> ] |
|------------------------------------------------|-----|-------------------------------|
| Number of respondents (women)                  | 347 |                               |
| Asked permission (Yes)                         | 307 | 91.5 [2.0]                    |
| Permission granted (Yes)                       | 300 | 97.7 [0.7]                    |
| Significant barriers to care                   |     |                               |
| Obtaining permission to go to the doctor       | 11  | 2.9 [0.9]                     |
| Lack of money required for advice or treatment | 100 | 25.5 [9.6]                    |
| Distance to health facility                    | 147 | 43.3 [7.5]                    |
| Not wanting to go alone                        | 148 | 44.0 [4.7]                    |
| Other <sup>2</sup>                             | 41  | 11.7 [0.8]                    |

212 **Source:** Nyangatom sample

213 <sup>1</sup>Linearized standard error.

214 <sup>2</sup> Of the 11.7% (41/347) of women responding that “Other” factors prevented them from seeking health  
215 care, the majority (69.7%, 28/41) reported that this problem was due to the requirements of caring for  
216 livestock and domestic chores.

217

## 218 Children’s Health

219 We collected health and anthropometric information from 826 of the under-15-year-old children  
220 in our sample (see SI Methods). Our final analytic sample was comprised of 547 under-five-  
221 year-old children, including 262 male children and 285 female children (Table 3).

222

223

224 **Table 3** Sample size and demographic characteristics of 547 Nyangatom under-five-year-old children included in  
225 our analysis

|                                      |                   |
|--------------------------------------|-------------------|
| Number of children in sample         | 826               |
| Under-5 children                     | 547               |
| Child sex (under-5)                  |                   |
| Male                                 | 262 (47.5)        |
| Female                               | 285 (52.5)        |
| Total                                | 547 (100)         |
| Sex ratio (male/female x 100)        | 90.4              |
| Child age (% RI) [% MI] <sup>1</sup> |                   |
| 0                                    | 82 (15.6) [16.5]  |
| 1                                    | 97 (17.5) [17.8]  |
| 2                                    | 74 (14.2) [22.0]  |
| 3                                    | 166 (29.1) [21.8] |
| 4                                    | 128 (23.6) [21.9] |
| Total                                | 547 (100) [100]   |

226 **Source:** Nyangatom sample

227 <sup>1</sup> Values and percentages in (% OS) are based on reported month and year of birth. Percentages in [% MI] were  
228 calculated using imputed values on month of birth.

229

### 230 Vaccination Status

231 62.8% (95% CI: 23.0-90.5%, n = 91) of the youngest children in our sample between 12-35  
232 months of age had ever received at least one vaccination, compared to 84.1% in SNNPR. Only  
233 14.6% (95% CI: 1.8-61.5%, 14/92) of mothers reported ever having a vaccination card in their  
234 possession for their children ages 12-23 months compared to 42.3% of children in this age range  
235 regionally in the 2016 EDHS, while among children ages 24-35 months, 8.8% (95% CI: 0.6-  
236 61.0%, 5/53) of mothers reported ever having been issued a vaccination card, versus 34.7% in  
237 the 2016 EDHS. An even smaller percentage (3.9%, 6/145) of respondents were able to present  
238 their vaccination card to researchers (6.4% for Nyangatom children ages 12-23 months compared  
239 to 28.8% of the corresponding age group in the region as reported by the 2016 EDHS). Only

240 5.9% (95% CI: 0.2-62.5%, 5/91) of mothers reported knowing the purpose of the vaccinations  
241 her child had received (SI Table 3).

242

### 243 Treatment for Symptoms of Infectious Disease in Children

244 Nyangatom women in our sample sought health treatment for their children under five years of  
245 age at rates similar to national samples. For instance, in cases of children's diarrheal illness,  
246 49.6% (95% CI, 32.7-66.4) of Nyangatom mothers whose children had diarrhea in the past two  
247 weeks sought treatment compared to 47.8% regionally. 46.6% of Nyangatom mothers whose  
248 children had febrile illness in the two weeks preceding the survey date sought treatment for their  
249 child's sickness, compared to 36.7% regionally. Of mothers who sought treatment for their  
250 child's illness, the majority visited a health clinic (65.2% for diarrheal illness and 62.4% for  
251 febrile illness) rather than a traditional provider (32.2% for diarrheal illness and 32.6% for febrile  
252 illness). See SI Table 4 for complete summary statistics on treatment-seeking.

253

### 254 Anthropometric Data

255 Estimates of HAZ/stunting, WAZ/underweight, and WHZ/wasting were based on samples  
256 comprising 339, 190, and 182 under-five-year-old children, respectively (see SI Methods). Mid-  
257 upper arm circumference (MUAC) measurements were recorded for 339 children aged 6-59  
258 months. Nutritional status was favorable among Nyangatom children in comparison to rural data  
259 from the 2016 EDHS. This finding was most significant with respect to WHZ/Wasting. 13.3% of  
260 under-five-year-old children in our sample met criteria for wasting compared to 24.8% from the  
261 2016 rural EDHS, and only 1.1% met criteria for severe wasting compared to 7.3% of children in  
262 the 2016 rural EDHS (Figure 3). The lower prevalence of stunting and wasting observed among

263 our sample as compared to the 2016 DHS calculated using height and weight measurements was  
264 consistent with our finding that very few children (2.1%) met the criteria for severe acute  
265 malnutrition (SAM), calculated using MUAC. See Table 4 for complete results on stunting,  
266 wasting, and other anthropometric data.

267

268



269 **Table 4** Nutrition status of under-5 children, Nyangatom 2017

| Anthropometric failure                        | Ethiopia DHS 2016 (Weighted Mean/%) |                               | n (%) / mean (95% CI)              |                                                 |
|-----------------------------------------------|-------------------------------------|-------------------------------|------------------------------------|-------------------------------------------------|
|                                               | Rural                               | SNNPR (p-value <sup>1</sup> ) | Month, day and year of birth known | Month of birth estimated by multiple imputation |
| <b>HAZ / Stunting</b>                         |                                     |                               |                                    |                                                 |
| Sample size (n)                               |                                     |                               | 164                                | 339 <sup>a</sup>                                |
| Mean HAZ (95% CI)                             | -1.5                                | -1.5 (0.09)                   | -0.88 (-1.77, 0.01)                | -0.83 (-2.27, 0.62)                             |
| Stunted n (%)                                 | 39.9                                | 38.6 (0.38)                   | 59 (35.3)                          | (33.7)                                          |
| Severely stunted                              | 18.4                                | 20.2 (0.76)                   | 36 (21.2)                          | (19.3)                                          |
| <b>WAZ / Underweight</b>                      |                                     |                               |                                    |                                                 |
| Sample size (n)                               |                                     |                               | 78                                 | 190                                             |
| Mean WAZ (95% CI)                             | -0.5                                | -0.2 (0.07)                   | -0.89 (-1.76, -0.03)               | -0.77 (-2.29, 0.76)                             |
| Underweight n (%)                             | 10.1                                | 6 (0.01)                      | 21 (26.9)                          | (18.5)                                          |
| Severely underweight                          | 3                                   | 1.7 (0.22)                    | 6 (7.1)                            | (4.5)                                           |
| <b>WHZ / Wasting</b>                          |                                     |                               |                                    |                                                 |
| Sample size (n)                               |                                     |                               | 73                                 | 182                                             |
| Mean WHZ (95% CI)                             | -1.2                                | -1 (0.49)                     | -1.08 (-1.52, -0.65)               | -1.09 (-2.08, -0.09)                            |
| Wasting n (%)                                 | 24.8                                | 21.1 (0.63)                   | 14 (18.3)                          | (13.3)                                          |
| Severe wasting                                | 7.3                                 | 6.4 (0.09)                    | 2 (2.7)                            | (1.1)                                           |
| <b>Mid-upper arm circumference (MUAC), cm</b> |                                     |                               |                                    |                                                 |
| Sample size (Number of under-5 children >6m)  |                                     |                               | 157                                | 339                                             |
| Mean (cm)                                     |                                     |                               | 13.5                               | 13.6 <sup>a</sup>                               |
| Severe acute malnutrition (SAM: MUAC <11.5cm) |                                     |                               | 4 (1.1)                            | (2.1)                                           |

270 **Source:** Nyangatom sample

271 <sup>1</sup> p-value of the Adjusted Wald test (that accounts for the survey design) for the null Hypothesis  $H_0: Prop_{DHS2016} =$   
 272  $Prop_{Nyangatom2017}$ , with a level of significance of 5% ['Prop' stands for 'mean' or 'proportion'].

273 <sup>a</sup> Estimation sample varies across imputations; Sample sizes vary between 337-343 for HAZ/stunting, and between  
 274 336-343 for MUAC.

275

276

277

[Figure 3 here]

278 **Figure 3** Severe Acute Malnutrition and Wasting by sex based on Height-for-Weight (HW) of Nyangatom under-  
279 five-year-old children in comparison to WHO Height-for-Weight reference chart values. The lightly shaded region  
280 indicates the WHO median to 3 SDs, while the darker shaded region is the 95% CI of the Nyangatom sample.  
281 Children falling below the dashed line ( $<-2SD$ ) meet the WHO definition for wasting, while those with HW  $<-3SD$   
282 meet criteria for SAM.

283 **Source:** Nyangatom sample and data from WHO-UNICEF 2009<sup>16</sup>.

284 Note: Sample restricted to children with valid measures for WHZ (using the original sample,  $n=182$ ). Observation  
285 symbol size represents the probability proportional to size sample weighting (15.1, 21.9, and 23.5) used in the Loess  
286 smoothed regression line and 95% CI. Where month of birth was unknown we used multiple imputation to estimate  
287 date of birth (month/year; see SI methods).  
288  
289

## 290 Discussion

291 Our results demonstrate that geospatial sampling frameworks can be used to construct  
292 representative samples of nomadic populations in a logistically feasible, cost-sensitive manner.  
293 Our approach was designed to overcome the limitations of conventional sampling frames, which  
294 contribute to the exclusion of nomadic groups in survey data by failing to take into account these  
295 populations' mobility.<sup>1,8</sup> Household surveys including the DHS, the World Bank's Living  
296 Standards Measurement Study (LSMS), and UNICEF's Multiple Indicator Cluster Surveys  
297 (MICS) conventionally rely on census-based enumeration lists to construct their sampling  
298 frames. Because these enumeration lists are usually conducted well before the survey, these  
299 methods create bias that disproportionately affects mobile groups.

300

301 While enumerations using geospatial imagery have been reported at the single settlement level,<sup>12</sup>  
302 this is to our knowledge the first time a geospatial sampling frame was implemented to conduct a  
303 population-level assessment. The use of recent satellite imagery played a crucial role by  
304 providing nearly real-time information about the current distribution of the target population.  
305 Previous studies found that dispatching survey personnel without first determining the  
306 inhabitation status of randomized geographic regions proved logistically infeasible.<sup>8</sup> By

307 enumerating currently inhabited settlements in advance, we were able to assess active population  
308 distributions to generate density estimates in a remote, difficult-to-access area. We then  
309 demonstrated the logistical feasibility of geospatial sampling for collecting population-level data  
310 through our field validation. This method may be a promising alternative for use in pastoralist  
311 regions, with the potential to increase the representation of mobile populations in health  
312 surveillance data.

313

314 Compared to the 2016 EDHS sample regionally and in rural areas nationally, Nyangatom women  
315 demonstrate a relatively high uptake of ANC services. Recent NGO- and government-supported  
316 MCH initiatives, including the construction of an MCH building and provision of MCH services  
317 free of charge at the local health clinic combined with the opening of a road through the region  
318 increasing access to transportation, may explain this trend. Our finding that, under certain  
319 conditions, pastoralist women seek treatment at health facilities at rates comparable to regional  
320 non-pastoralist populations counters narratives that pastoralists tend to underutilize health  
321 services because of cultural beliefs or preferences for traditional healers.<sup>17</sup> At a minimum, our  
322 findings suggest that such reports cannot be extrapolated to characterize the health-seeking  
323 behavior of pastoralist populations in general.

324

325 Despite higher ANC-seeking rates, skilled birth attendance (SBA) was significantly lower  
326 (6.4%) among the Nyangatom compared not only to the average from rural areas nationally  
327 (21.2%), but also lower than the lowest regional figure reported by the 2016 Ethiopia DHS  
328 (16.4% in the Afar region). The national trend in the reduction of at-home births has not reached  
329 this population, and the vast majority of births occur at home (91.2%) compared to the national

330 rural average (79.0%, down from 95.4% in 2011; alternatively, only 6.8% in our sample  
331 delivered at a health facility vs. 19.6% in rural areas nationally). The determinates of this  
332 discrepancy would benefit from further research. Among pastoralist women, ANC may be more  
333 accessible since they can time their visits when their encampments are settled in a location  
334 favoring travel to a health facility. By contrast, pastoralist women may be unable to time their  
335 deliveries to give birth at a health clinic, as they frequently continue to migrate with mobile  
336 livestock encampments and perform domestic labor in locations distant from health facilities  
337 until late in their pregnancy. Though the generalizability of this finding to other pastoralist  
338 populations should be investigated, this result highlights opportunities to target programming,  
339 outreach, and additional research towards SBA and delivery practices among pastoralists.

340

341 Though limited by lack of reliable documentation, Nyangatom children in our sample had low  
342 vaccination coverage compared to the EDHS, with only 62.8% of Nyangatom children ages 12-  
343 35 months having ever received a vaccination versus 84.1% of children regionally in SNNPR.  
344 The vast majority of our respondents did not retain possession of their vaccination cards, even  
345 when these documents had been provided to them, or produced documents that were unreadable  
346 due to weathering from dirt and mold. As a result, mothers were not able to furnish definitive  
347 documentation of full immunization coverage for any of the children in our sample. However, by  
348 mothers' recall, these findings are consistent with other reports of low rates of vaccination  
349 coverage among pastoralists populations in other regions.<sup>18-20</sup>

350

351 Ethiopia's National Expanded Programme on Immunization has identified pastoralists as the  
352 predominant population at risk for missing immunization services.<sup>21</sup> Many respondents in our

353 sample reported that their children missed vaccination events while residing in a different area  
354 than where coverage was provided. These accounts are similar to those of Fulani pastoralists in  
355 Nigeria, the majority of whom reported they were missed by supplementary immunization  
356 activities during an oral polio vaccination campaign due to absence of the child at the time of  
357 health workers' visit.<sup>22</sup> Such studies provide support for the argument that sampling bias may  
358 lead to substantial inaccuracies in estimates of vaccination coverage,<sup>23</sup> and suggest that even  
359 mobile vaccination programs may be insufficient if they are not informed by detailed knowledge  
360 of seasonal transhumance patterns.

361  
362 Our findings suggest that conventional and dominant narratives of factors preventing pastoralist  
363 women from seeking health care may require further consideration. Among our study population,  
364 money, women's empowerment, and distance to a health facility do not appear to be as  
365 significant an impediment to seeking care as insecurity and the largely neglected issue of  
366 domestic labor. Subsistence livelihoods rely on intensive daily labor from female household  
367 members, such as milking and watering livestock, and collecting firewood and water. While for  
368 urban populations lack of access to money may be a major impediment, among pastoralists, the  
369 requirements of household labor may be more significant. Likewise, living in a patriarchal  
370 society such as that of the Nyangatom cannot in and of itself be interpreted to mean that  
371 obtaining permission from husbands is a significant barrier to care. This finding differs from  
372 previous studies reporting that men's control over health care decisions is a primary barrier to  
373 care for pastoralist women.<sup>20,24</sup> Although the women in our sample usually needed to obtain their  
374 husband's permission to seek care, the vast majority (97%) said that their husband granted them  
375 permission all of the time, and that therefore obtaining his permission was not a barrier to care.

376

377 Nyangatom children had a lower prevalence of severe acute malnutrition (SAM) and stunting  
378 compared to national averages. Though we believe that these results represent adequate  
379 nutritional status of the pastoralist children in our sample, the issue of survivorship remains a  
380 possibility if undernourished children do not survive to appear in our sample. For children above  
381 approximately 6 months, our results are consistent with findings from previous research  
382 demonstrating that settled children may have poorer nutritional status, attributed to the decreased  
383 access to milk and animal products associated with a sedentarized diet, even when total caloric  
384 intake may be greater.<sup>25,26</sup> There may be variability between populations, as other studies have  
385 found children of nomadic families to have unfavorable nutritional status compared to sedentary  
386 counterparts.<sup>19,27</sup> These findings underscore that arguments for sedentarization premised on  
387 improvements in childhood nutritional status (often put forward by development agencies,  
388 national governments, and non-governmental organizations) should be based on rigorous and  
389 systematically sampled data.<sup>26</sup> An additional salient finding of our study concerned the misuse of  
390 veterinary medicine for self-treatment. Numerous mothers reported administering livestock  
391 medicine to their children, including the use of injectable cattle ivermectin applied directly to the  
392 eyes for pediatric ophthalmic illness, and veterinary oxytetracycline as an orally administered  
393 antitussive. This potentially concerning practice merits further research.

394

395 The limitations of this study highlight several challenges inherent in surveying pastoralist  
396 populations that are not typically encountered in survey work. First, Nyangatom women in our  
397 study population were generally unable to accurately date events and ages. As a result, it was  
398 necessary to impute ages for a number of children in our sample, with a potential impact on

399 indicators depending on children’s precise age. Second, the domestic labor schedules of our  
400 participants severely constrained both the hours during which it was feasible to collect data as  
401 well as participants’ susceptibility to survey fatigue, limiting the length of our survey. During  
402 data collection, women were occupied chasing birds away from their fields, and often left their  
403 villages before dawn to do so. For similar reasons, we were unable to interview household heads,  
404 who herded cattle during the day and were rarely present in the same location as the women  
405 participants.

406  
407 Despite pastoralist groups’ long history of “invisibility” in population data, our sampling design  
408 and successful field deployment indicate that geospatially derived sampling frames hold  
409 significant potential for the systematic health surveillance of mobile populations. The substantial  
410 disparities we found between the study population and DHS-derived country estimates for  
411 certain MCH indicators suggest that without the implementation of alternative sampling  
412 strategies capable of accounting for mobility, key indicators in household data collected and used  
413 to monitor progress on Sustainable Development Goals and other targets may present a  
414 dramatically inaccurate picture of pastoralists’ health status.

415  
416 Our findings suggest several specific ways in which MCH interventions among pastoralists can  
417 be improved. First, vaccination outreach campaigns should strategically coordinate their timing  
418 to occur when settlements are at their largest size, often during the wet season in order to avoid  
419 missing inhabitants of livestock encampments widely dispersed across remote grazing territory  
420 in times of scarcity<sup>25</sup>. Second, alternative record-keeping systems for immunizations should be  
421 developed and implemented with pastoralists. It is not feasible to expect that nomadic

422 households will retain these documents, nor that paper cards will weather exposure to the  
423 elements incurred during frequent migrations.

424

425 Additionally, our findings suggest that men's control over health care decisions may not be a  
426 major barrier to pastoralist women's ability to seek care, even in cases where a husband's  
427 permission is required. By contrast, domestic labor and responsibilities such as caring for the  
428 family's livestock, homestead, and other children appear to be significant and under-recognized  
429 barriers to pastoralist women seeking care. Efforts targeting these domains may be more  
430 effective in improving MCH among pastoralists, and empirically informed studies investigating  
431 the determinants of health-seeking behavior should be used to guide programming and decision-  
432 making. Interventions focusing on men's awareness, for example, may not be as effective or  
433 impactful as providing secure, expedient transportation to a clinic to minimize time away from  
434 the household.

435

436 Above all, we propose that policymakers and national governments implement the use of  
437 geospatial sampling frames in pastoralist regions to reduce under-coverage and prevent bias in  
438 national estimates. This is a crucial step towards designing health systems and implementing  
439 longitudinal health surveillance for underserved mobile groups. Such an approach can aid in  
440 more effectively targeting the limited resources of national Ministries of Health, and serve as an  
441 urgently needed foundation to include mobile pastoralists in frameworks for achieving universal  
442 health coverage.



## Acknowledgements

We thank the College of Development Studies at Addis Ababa University for hosting our research, including Drs. Dilu Shaleka and Emezat Mengesha; Dr. Elias Alemu and Dr. Hannah Getachew of Hawassa University School of Behavioral Sciences; Gemechu Kuffa and colleagues at the SNNPR Health Bureau; and the Nyangatom Administration, especially Lore Kakuta. We are particularly grateful for logistical support provided by Semie Anbesse, as well as from Zelalem Worku. We thank Solomon Tilahun for providing shapefiles used in geospatial analysis, and Mina Mousa of Stanford University School of Medicine's Information Resources and Technology for remote technical support which was essential for our fieldwork.

## Financial Support

This work was supported by Stanford MedScholars Program, the Stanford Center for African Studies, and the American Society of Tropical Medicine and Hygiene Benjamin H. Kean Fellowship. The DigitalGlobe Foundation generously provided the satellite imagery used to conduct this study.

## Disclosures

We declare no competing interests.

## Author List

1. Hannah Wild\*: Stanford University School of Medicine, Stanford, CA, USA; [hwild@stanford.edu](mailto:hwild@stanford.edu)
2. Luke Glowacki\*: Department of Anthropology, Pennsylvania State University; [glowacki@psu.edu](mailto:glowacki@psu.edu)
3. Stace Maples: Stanford Geospatial Center, Stanford University, Stanford, CA, USA; [stacemaples@stanford.edu](mailto:stacemaples@stanford.edu)
4. Iván Mejía-Guevara: Department of Biology, Stanford University; Stanford Center for Population Health Sciences, Stanford University School of Medicine, Stanford, CA, USA; [imejia@stanford.edu](mailto:imejia@stanford.edu)
5. Amy Krystosik: Department of Pediatrics, Division of Infectious Disease, Stanford University School of Medicine, Stanford, CA, USA; [akrystos@stanford.edu](mailto:akrystos@stanford.edu)
6. Matthew H. Bonds: Department of Global Health & Social Medicine, Harvard Medical School, Boston, MA, USA; [matthew\\_bonds@hms.harvard.edu](mailto:matthew_bonds@hms.harvard.edu)
7. Abiy Hiruy: Pathfinder International, Addis Ababa, Ethiopia; [ahiruy@pathfinder.org](mailto:ahiruy@pathfinder.org)
8. A. Desiree LaBeaud: Department of Pediatrics, Division of Infectious Disease, Stanford University School of Medicine, Stanford, CA, USA; [dlabeaud@stanford.edu](mailto:dlabeaud@stanford.edu)
9. Michele Barry: The Center for Innovation in Global Health, Stanford University, Stanford, CA, USA; [michele.barry@stanford.edu](mailto:michele.barry@stanford.edu)

\* To whom correspondence should be addressed. Email: [hwild@stanford.edu](mailto:hwild@stanford.edu) or [glowacki@psu.edu](mailto:glowacki@psu.edu)

## References

- 1 Randall S. Where have all the nomads gone? Fifty years of statistical and demographic invisibilities of African mobile pastoralists. *Pastoralism* 2015; **5**: 22.
- 2 Zinsstag J, Taleb MO, Craig PS. Health of nomadic pastoralists: new approaches towards equity effectiveness. *Trop Med Int Health* 2018; **11**: 565–8.
- 3 Montavon A, Jean-Richard V, Bechir M, *et al.* Health of mobile pastoralists in the Sahel – assessment of 15 years of research and development. *Trop Med Int Health* 2018; **18**: 1044–52.
- 4 Carr-Hill RA. Measuring Progress toward the Millennium Development Goals and the Missing Millions. *World Health Popul* 2013; **14**: 4–11.
- 5 El Shiekh B, van der Kwaak A. Factors influencing the utilization of maternal health care services by nomads in Sudan. *Pastoralism* 2015; **5**: 23.
- 6 Kalsbeek WD. Nomad sampling: an analytic study of alternative design strategies. *Proc Sect Surv Res Methods* 1986.
- 7 Weibel D, Schelling E, Bonfoh B, *et al.* Demographic and health surveillance of mobile pastoralists in Chad: integration of biometric fingerprint identification into a geographical information system. *Geospatial Health* 2008; **3**: 113–24.
- 8 Himelein K, Eckman S, Murray S. Sampling nomads: a new technique for remote, hard-to-reach, and mobile populations. *J Off Stat* 2014; **30**: 191–213.
- 9 Jean-Richard V, Crump L, Daugla DM, Hattendorf J, Schelling E, Zinsstag J. The use of mobile phones for demographic surveillance of mobile pastoralists and their animals in Chad: proof of principle. *Glob Health Action* 2014; **7**. DOI:10.3402/gha.v7.23209.
- 10 Chen X, Hu H, Xu X, Gong J, Yan Y, Li F. Probability Sampling by Connecting Space with Households Using GIS/GPS Technologies. *J Surv Stat Methodol* 2018; **6**: 149–68.
- 11 Haenssger MJ. Satellite-aided survey sampling and implementation in low- and middle-income contexts: a low-cost/low-tech alternative. *Emerg Themes Epidemiol* 2015; **12**: 20.
- 12 Pearson AL, Rzotkiewicz A, Zwickle A. Using remote, spatial techniques to select a random household sample in a dispersed, semi-nomadic pastoral community: utility for a longitudinal health and demographic surveillance system. *Int J Health Geogr* 2015; **14**: 33.
- 13 Summary and statistical report of the 2007 population and housing census: population size by age and sex. 2008. <http://agris.fao.org/agris-search/search.do?recordID=XF2015048396> (accessed June 30, 2018).
- 14 Glowacki L, Wrangham R. Warfare and reproductive success in a tribal population. *Proc Natl Acad Sci* 2015; **112**: 348–53.
- 15 Central Statistical Agency. Ethiopia Demographic and Health Survey 2016. 2016. <http://dhsprogram.com/publications/publication-FR328-DHS-Final-Reports.cfm> (accessed June 30, 2018).
- 16 World Health Organization. WHO child growth standards and the identification of severe acute malnutrition in infants and children: joint statement by the World Health Organization and the United Nations Children’s Fund. 2009. <http://apps.who.int/iris/bitstream/handle/10665/44129/9789?sequence=1>.
- 17 Haasnoot PJ, Boeting TE, Kuney MO, van Roosmalen J. Knowledge, Attitudes, and Practice of Tuberculosis among Maasai in Simanjiro District, Tanzania. *Am J Trop Med Hyg* 2010; **83**: 902–5.

- 18 Sheik-Mohamed A, Velema JP. Where health care has no access: the nomadic populations of sub-Saharan Africa. *Trop Med Int Health* 2018; **4**: 695–707.
- 19 Lawson DW, Mulder MB, Ghiselli ME, *et al.* Ethnicity and Child Health in Northern Tanzania: Maasai Pastoralists Are Disadvantaged Compared to Neighbouring Ethnic Groups. *PLOS ONE* 2014; **9**: e110447.
- 20 Schelling E, Weibel D, Bonfoh B. Learning from the Delivery of Social Services to Pastoralists: Elements of Good Practice. Nairobi, Kenya: WISP/IUCN, 2008.
- 21 Ethiopia National Expanded Programme on Immunization. 2015. [http://www.nationalplanningcycles.org/sites/default/files/country\\_docs/Ethiopia/ethiop\\_cmyplatest\\_revised\\_may\\_12\\_2015.pdf](http://www.nationalplanningcycles.org/sites/default/files/country_docs/Ethiopia/ethiop_cmyplatest_revised_may_12_2015.pdf) (accessed Oct 10, 2018).
- 22 Michael CA, Ashenafi S, Ogbuanu IU, *et al.* An Evaluation of Community Perspectives and Contributing Factors to Missed Children During an Oral Polio Vaccination Campaign – Katsina State, Nigeria. *J Infect Dis* 2014; **210**: S131–5.
- 23 Cutts FT, Izurieta HS, Rhoda DA. Measuring Coverage in MNCH: Design, Implementation, and Interpretation Challenges Associated with Tracking Vaccination Coverage Using Household Surveys. *PLOS Med* 2013; **10**: e1001404.
- 24 Hampshire K. Networks of nomads: negotiating access to health resources among pastoralist women in Chad. *Soc Sci Med* 1982 2002; **54**: 1025–37.
- 25 Leslie PW, Little MA. Turkana herders of the dry savanna: ecology and biobehavioral response of nomads to an uncertain environment. New York: Oxford University Press, 1999.
- 26 Fratkin E, Roth EA, Nathan MA. Pastoral Sedentarization and Its Effects on Children’s Diet, Health, and Growth Among Rendille of Northern Kenya. *Hum Ecol* 2004; **32**: 531–59.
- 27 Galvin KA, Beeton TA, Boone RB, BurnSilver SB. Nutritional Status of Maasai Pastoralists under Change. *Hum Ecol* 2015; **43**: 411–24.



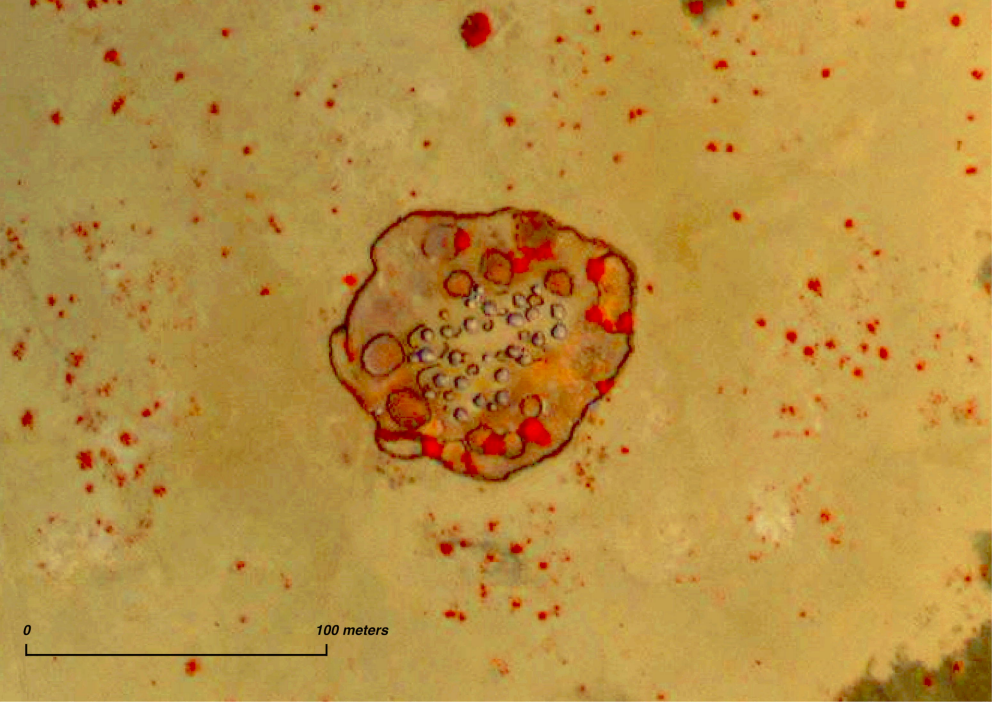

0 100 meters

# Barriers to Care

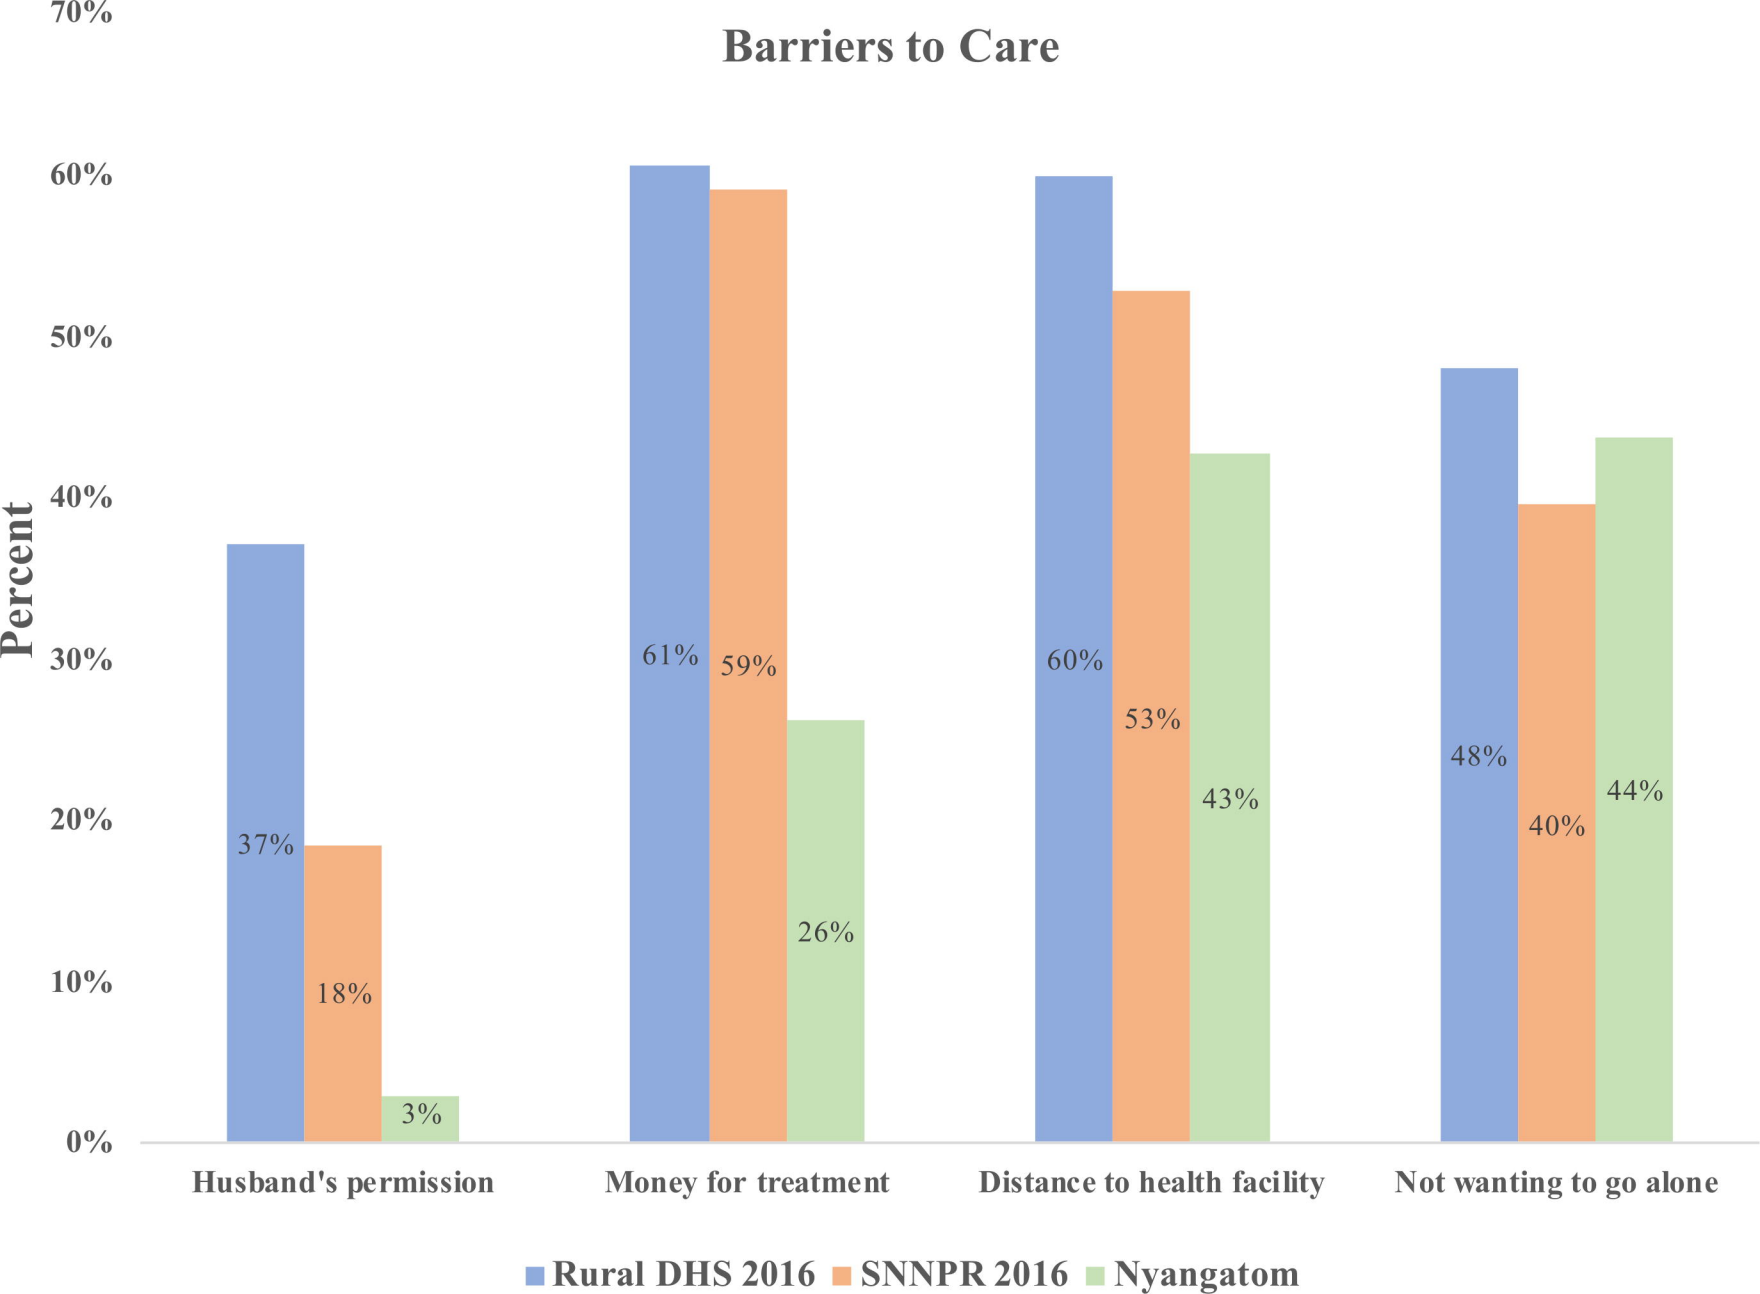

Sample Weights

- 15.1
- 21.9
- 23.5

- Nyangatom 95%CI
- - - WHO -2SD

MALE

FEMALE

Weight (Kg)

Height (cm)

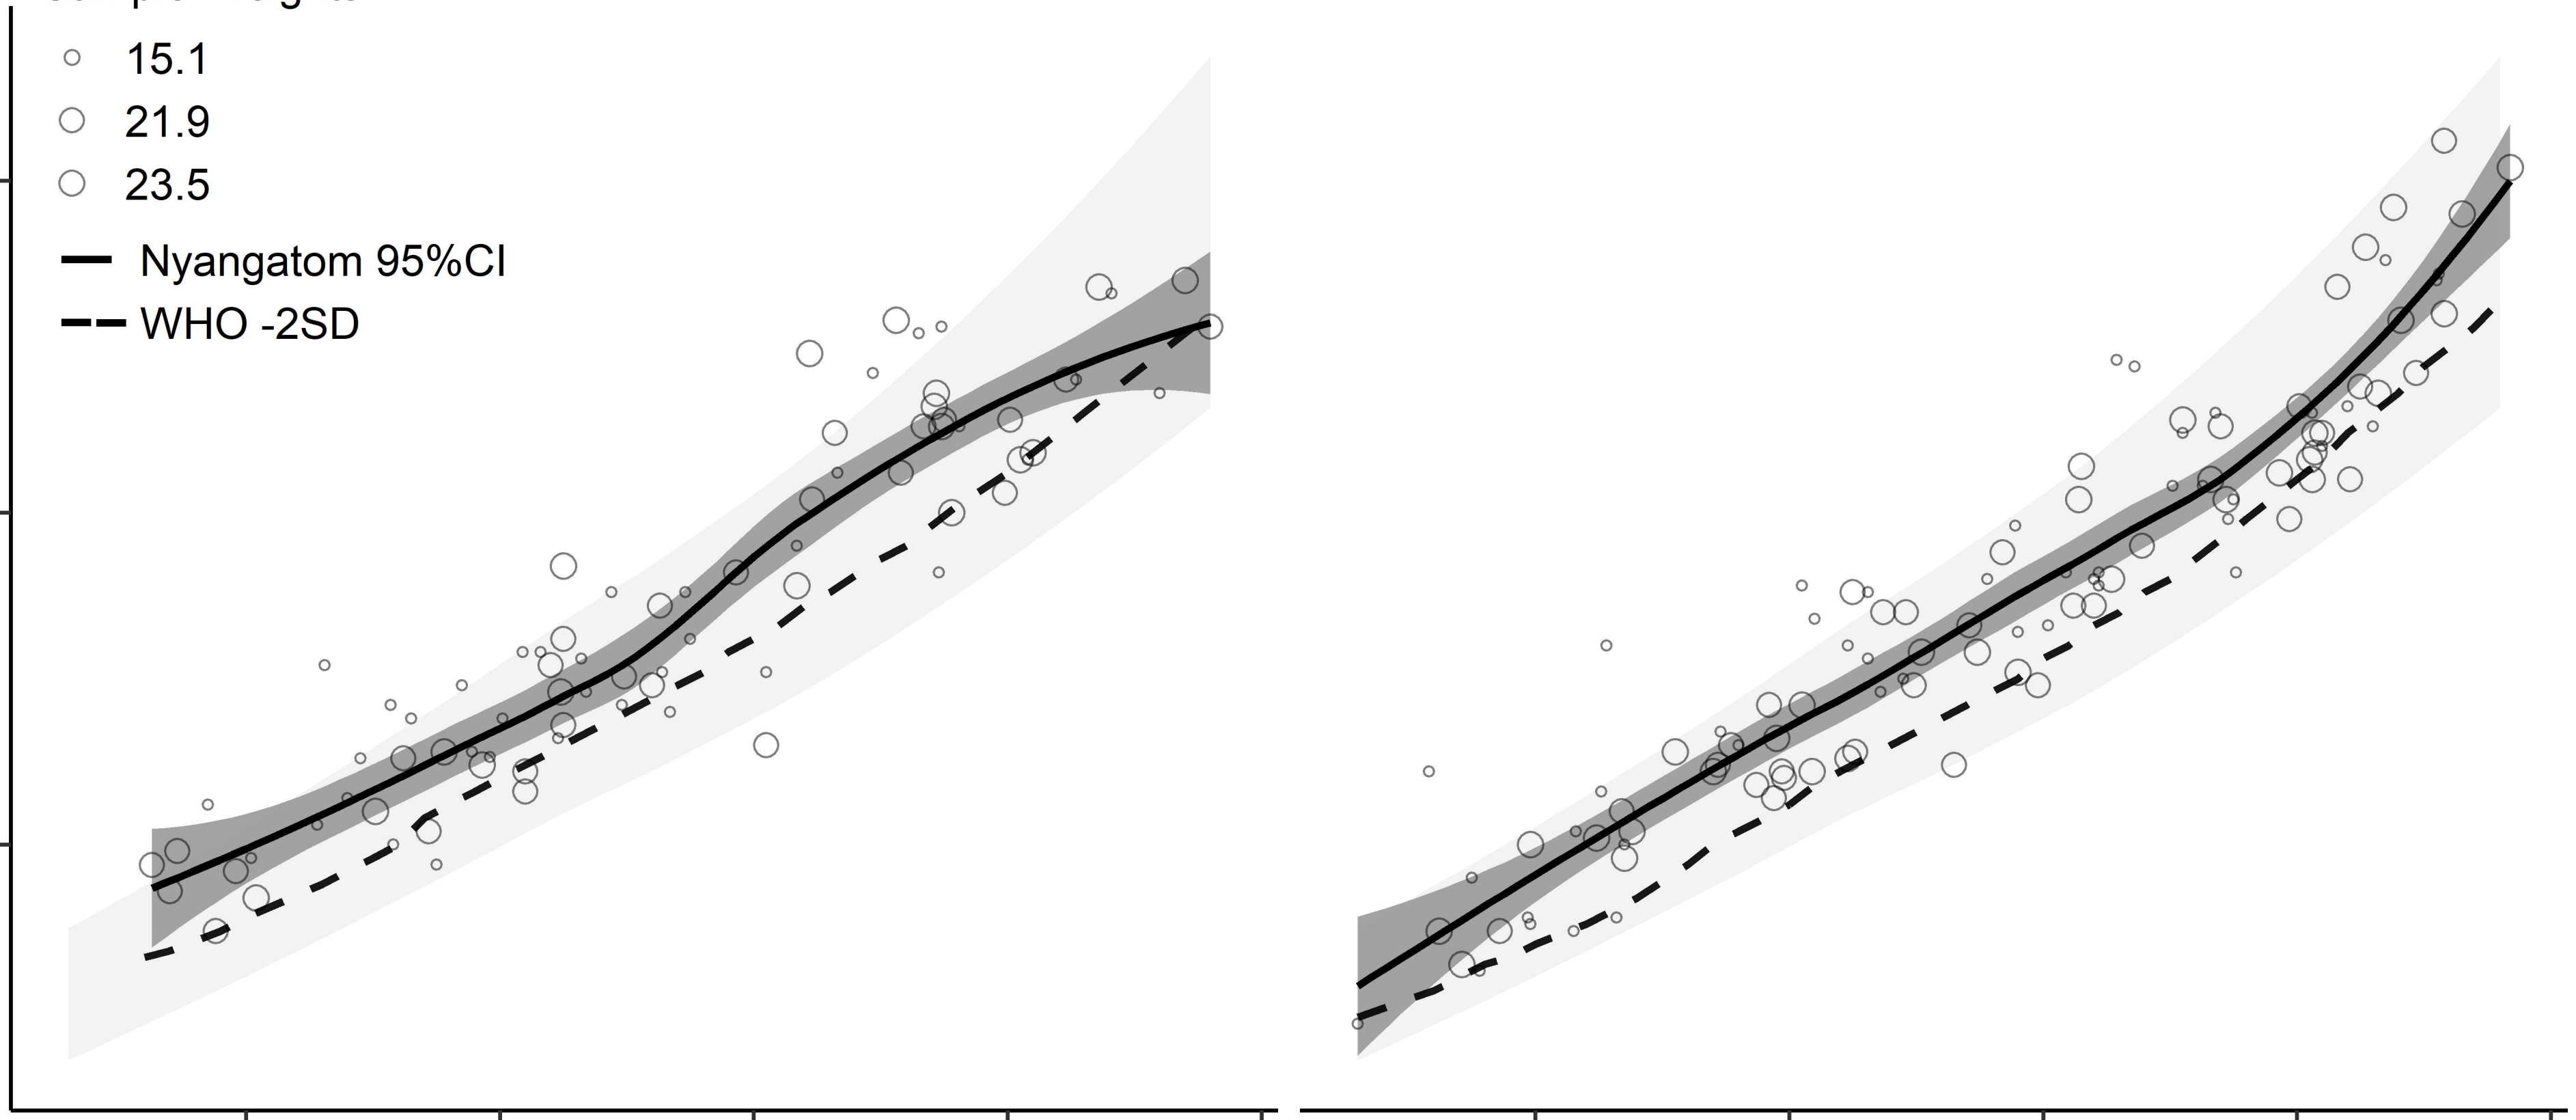

Source: https://www.biorxiv.org/content/10.1101/572685v1.full.pdf
